# Supplementary material for: Cerebrospinal Fluid in Classical Trigeminal Neuralgia: An Exploratory Study on Candidate Biomarkers
Source: MDPI journal article supplement (doi:10.3390/biomedicines10050998), 2022-04-26
Supplement: s1 [file s1]

**Supplementary Table S1. Analyzed CSF biomarkers with the Proseek Multiplex Development 96**

| <b>Biomarkers</b>                                                                |
|----------------------------------------------------------------------------------|
| ADP-ribosyl cyclase/cyclic ADP-ribose hydrolase 2 (BST1)                         |
| ADP-sugar pyrophosphatase (NUDT5)                                                |
| Aggrecan core protein (ACAN)                                                     |
| Amyloid beta A4 protein (APP)                                                    |
| Angiopoietin-related protein 4 (ANGPTL4)                                         |
| Arylsulfatase A (ARSA)                                                           |
| Basal cell adhesion molecule (BCAM)                                              |
| Beta-1,4-galactosyltransferase 1 (B4GALT1)                                       |
| Beta-1,4-glucuronyltransferase 1 (B4GAT1)                                        |
| Beta-glucuronidase (GUSB)                                                        |
| Beta-microseminoprotein (MSMB)                                                   |
| C-C motif chemokine 21 (CCL21)                                                   |
| C-type lectin domain family 11 member A (CLEC11A)                                |
| C-type lectin domain family 14 member A (CLEC14A)                                |
| Carbonic anhydrase 2 (CA2)                                                       |
| Carbonic anhydrase 6 (CA6)                                                       |
| Cathepsin F (CTSF)                                                               |
| Cation-independent mannose-6-phosphate receptor (IGF2R)                          |
| CCN family member 5 (CCN5)                                                       |
| CD109 antigen (CD109)                                                            |
| CD177 antigen (CD177)                                                            |
| CD209 antigen (CD209)                                                            |
| CD97 antigen (CD97)                                                              |
| CD99 antigen-like protein 2 (CD99L2)                                             |
| Cell adhesion molecule-related/down-regulated by oncogenes (CDON)                |
| CMRF35-like molecule 9 (CD300LG)                                                 |
| Cochlin (COCH)                                                                   |
| Collectin-12 (COLEC12)                                                           |
| Contactin-4 (CNTN4)                                                              |
| Corticotropin-releasing factor-binding protein (CRHBP)                           |
| Cystatin-M (CST6)                                                                |
| Cysteine-rich motor neuron 1 protein (CRIM1)                                     |
| Cysteine-rich with EGF-like domain protein 2 (CRELD2)                            |
| Cytosolic phospholipase A2 (PLA2G4A)                                             |
| Desmocollin-2 (DSC2)                                                             |
| Dickkopf-related protein 3 (DKK3)                                                |
| Dystroglycan (DAG1)                                                              |
| Early activation antigen CD69 (CD69)                                             |
| Endothelial cell-selective adhesion molecule (ESAM)                              |
| Fc receptor-like protein 5 (FCRL5)                                               |
| Flavin reductase NADPH (BLVRB)                                                   |
| Follistatin-related protein 3 (FSTL3)                                            |
| Galactoside 3(4)-L-fucosyltransferase, Alpha-(1,3)-fucosyltransferase 5 (FUT3/5) |
| Glycoprotein hormones alpha chain (CGA)                                          |
| Glycoprotein Xg (XG)                                                             |
| Hepatitis A virus cellular receptor 2 (HAVCR2)                                   |

|                                                                                  |
|----------------------------------------------------------------------------------|
| HLA class II histocompatibility antigen gamma chain (CD74)                       |
| Inactive serine protease PAMR1 (PAMR1)                                           |
| Inhibin beta C chain (INHBC)                                                     |
| Integrin alpha-5 (ITGA5)                                                         |
| Integrin beta-1 (ITGB1)                                                          |
| Interleukin-13 receptor subunit alpha-1 (IL13RA1)                                |
| Kunitz-type protease inhibitor 1 (SPINT1)                                        |
| Kunitz-type protease inhibitor 2 (SPINT2)                                        |
| Lactadherin (MFGE8)                                                              |
| Laminin subunit alpha-4 (LAMA4)                                                  |
| LDLR chaperone MESD (MESDC2)                                                     |
| Legumain (LGMN)                                                                  |
| Leukocyte-associated immunoglobulin-like receptor 1 (LAIR1)                      |
| Low affinity immunoglobulin epsilon Fc receptor (FCER2)                          |
| Lymphocyte function-associated antigen 3 (CD58)                                  |
| Macrophage migration inhibitory factor (MIF)                                     |
| Matrilin-2 (MATN2)                                                               |
| Myocilin (MYOC)                                                                  |
| Nidogen-2 (NID2)                                                                 |
| Osteomodulin (OMD)                                                               |
| Paired immunoglobulin-like type 2 receptor alpha (PILRA)                         |
| Peptidyl-prolyl cis-trans isomerase B (PPIB)                                     |
| Phosphatidylethanolamine-binding protein 1 (PEBP1)                               |
| Platelet endothelial aggregation receptor 1 (PEAR1)                              |
| Platelet-derived growth factor receptor beta (PDGFRB)                            |
| Protein deglycase DJ-1 (PARK7)                                                   |
| Protein disulfide-isomerase (P4HB)                                               |
| Protein NOV homolog (NOV)                                                        |
| Receptor-type tyrosine-protein phosphatase F (PTPRF)                             |
| Roundabout homolog 1 (ROBO1)                                                     |
| Scavenger receptor class F member 1 (SCARF1)                                     |
| Semaphorin-7A (SEMA7A)                                                           |
| Serine protease HTRA2, mitochondrial (HTRA2)                                     |
| Serine protease inhibitor Kazal-type 1 (SPINK1)                                  |
| Serine protease inhibitor Kazal-type 5 (SPINK5)                                  |
| Signal-regulatory protein beta-1 (SIRPB1)                                        |
| Stress-induced-phosphoprotein 1 (STIP1)                                          |
| Synaptosomal-associated protein 29 (SNAP29)                                      |
| Thymosin beta-10 (TMSB10)                                                        |
| Tissue alpha-L-fucosidase (FUCA1)                                                |
| Tripeptidyl-peptidase 1 (TPP1)                                                   |
| Tumor necrosis factor receptor superfamily member 19L (RELTL)                    |
| Tyrosine-protein phosphatase non-receptor type 6 (PTPN6)                         |
| V-set and immunoglobulin domain-containing protein 4 (VSIG4)                     |
| WAP, Kazal, immunoglobulin, Kunitz and NTR domain-containing protein 2 (WFIKKN2) |

**Supplementary Table S2. Differences in spinal CSF biomarker concentrations between TN patients and controls – the entire linear regression analysis**

| <b>Biomarker</b>                                                  | <b>Coefficient</b> | <b>p (lm)</b>        | <b>q (lm)</b> |
|-------------------------------------------------------------------|--------------------|----------------------|---------------|
| C-type lectin domain family 11 member A (Clec11a)                 | 0.85               | 5.46e <sup>-05</sup> | 0.0037        |
| Legumain (LGMN)                                                   | 0.59               | 0.00015              | 0.0037        |
| Lactadherin (MFG-E8)                                              | 0.79               | 0.00016              | 0.0037        |
| Angiopoietin-related protein 4 (ANGPTL-4)                         | 0.60               | 0.00097              | 0.018         |
| Nidogen-2 (NID2)                                                  | 0.26               | 0.015                | 0.19          |
| Macrophage migration inhibitory factor (MIF)                      | 0.86               | 0.016                | 0.19          |
| Arylsulfatase A (ARSA)                                            | 0.31               | 0.028                | 0.28          |
| Beta-glucuronidase (GUSB)                                         | 0.23               | 0.038                | 0.30          |
| Osteomodulin (OMD)                                                | 0.30               | 0.042                | 0.30          |
| Tissue alpha-L-fucosidase (FUCA1)                                 | 0.33               | 0.042                | 0.30          |
| ADP-sugar pyrophosphatase (NUDT5)                                 | 0.35               | 0.051                | 0.33          |
| Protein deglycase DJ-1 (PARK7)                                    | 0.39               | 0.056                | 0.33          |
| Laminin subunit alpha-4 (LAMA4)                                   | 0.18               | 0.069                | 0.38          |
| Matrilin-2 (MATN2)                                                | 0.21               | 0.090                | 0.41          |
| Interleukin-13 receptor subunit alpha-1 (IL13RA1)                 | -0.10              | 0.092                | 0.41          |
| Peptidyl-prolyl cis-trans isomerase B (PPIB)                      | 0.24               | 0.092                | 0.42          |
| Platelet endothelial aggregation receptor 1 (PEAR1)               | 0.15               | 0.14                 | 0.57          |
| Beta-1,4-galactosyltransferase 1 (B4GALT1)                        | -0.15              | 0.16                 | 0.61          |
| Dickkopf-related protein 3 (DKK3)                                 | -0.07              | 0.18                 | 0.66          |
| HLA class II histocompatibility antigen gamma chain (CD74)        | -0.22              | 0.19                 | 0.67          |
| Platelet-derived growth factor receptor beta (PDGFRB)             | 0.16               | 0.25                 | 0.82          |
| Cell adhesion molecule-related/down-regulated by oncogenes (CDON) | 0.09               | 0.26                 | 0.82          |
| Phosphatidylethanolamine-binding protein 1 (PEBP1)                | 0.22               | 0.26                 | 0.82          |
| Paired immunoglobulin-like type 2 receptor alpha (PILRA)          | 0.11               | 0.41                 | 0.99          |
| Tumor necrosis factor receptor superfamily member 19L (RELTL)     | -0.13              | 0.42                 | 0.99          |
| Cathepsin F (CTSF)                                                | 0.12               | 0.42                 | 0.99          |
| CD99 antigen-like protein 2 (CD99L2)                              | -0.08              | 0.44                 | 0.99          |
| Lymphocyte function-associated antigen 3 (CD58)                   | 0.07               | 0.46                 | 0.99          |

|                                                                                  |       |      |      |
|----------------------------------------------------------------------------------|-------|------|------|
| Cation-independent mannose-6-phosphate receptor (IGF2R)                          | 0.09  | 0.48 | 0.99 |
| Receptor-type tyrosine-protein phosphatase F (PTPRF)                             | 0.11  | 0.48 | 0.99 |
| Collectin-12 (COLEC12)                                                           | 0.08  | 0.49 | 0.99 |
| Inactive serine protease PAMR1 (PAMR1)                                           | -0.09 | 0.50 | 0.99 |
| Tripeptidyl-peptidase 1 (TPP1)                                                   | 0.08  | 0.50 | 0.99 |
| Basal cell adhesion molecule (BCAM)                                              | 0.10  | 0.51 | 0.99 |
| Scavenger receptor class F member 1 (SCARF1)                                     | -0.11 | 0.51 | 0.99 |
| Early activation antigen CD69 (CD69)                                             | 0.09  | 0.53 | 0.99 |
| Cysteine-rich motor neuron 1 protein (CRIM1)                                     | 0.07  | 0.55 | 0.99 |
| Semaphorin-7A (SEMA7A)                                                           | 0.08  | 0.56 | 0.99 |
| Dystroglycan (DAG1)                                                              | 0.07  | 0.57 | 0.99 |
| CD97 antigen (CD97)                                                              | 0.08  | 0.59 | 0.99 |
| Desmocollin-2 (DSC2)                                                             | 0.08  | 0.61 | 0.99 |
| CD177 antigen (CD177)                                                            | -0.20 | 0.64 | 0.99 |
| Cysteine-rich with EGF-like domain protein 2 (CRELD2)                            | -0.07 | 0.68 | 0.99 |
| Signal-regulatory protein beta-1 (SIRPB1)                                        | 0.07  | 0.68 | 0.99 |
| Glycoprotein Xg (XG)                                                             | 0.07  | 0.68 | 0.99 |
| Leukocyte-associated immunoglobulin-like receptor 1 (LAIR1)                      | 0.06  | 0.70 | 0.99 |
| V-set and immunoglobulin domain-containing protein 4 (VSIG4)                     | 0.09  | 0.71 | 0.99 |
| Contactin-4 (CNTN4)                                                              | 0.06  | 0.73 | 0.99 |
| Glycoprotein hormones alpha chain (CGA)                                          | -0.10 | 0.74 | 0.99 |
| Thymosin beta-10 (TMSB10)                                                        | 0.10  | 0.74 | 0.99 |
| LDLR chaperone MESD (MESDC2)                                                     | -0.04 | 0.76 | 0.99 |
| Low affinity immunoglobulin epsilon Fc receptor (FCER2)                          | -0.08 | 0.76 | 0.99 |
| WAP, Kazal, immunoglobulin, Kunitz and NTR domain-containing protein 2 (WFIKKN2) | 0.06  | 0.77 | 0.99 |
| Roundabout homolog 1 (ROBO1)                                                     | 0.05  | 0.78 | 0.99 |
| Follistatin-related protein 3 (FSTL3)                                            | -0.04 | 0.79 | 0.99 |
| Synaptosomal-associated protein 29 (SNAP29)                                      | -0.04 | 0.80 | 0.99 |
| Cystatin-M (CST6)                                                                | -0.04 | 0.81 | 0.99 |
| Kunitz-type protease inhibitor 1 (SPINT1)                                        | -0.02 | 0.82 | 0.99 |
| Aggrecan core protein (ACAN)                                                     | 0.03  | 0.86 | 0.99 |
| Amyloid beta A4 protein (APP)                                                    | 0.01  | 0.89 | 0.99 |

|                                                     |        |      |      |
|-----------------------------------------------------|--------|------|------|
| C-type lectin domain family 14 member A (CLEC14A)   | 0.02   | 0.89 | 0.99 |
| Endothelial cell-selective adhesion molecule (ESAM) | -0.02  | 0.90 | 0.99 |
| Protein NOV homolog (NOV)                           | 0.01   | 0.91 | 0.99 |
| CD209 antigen (CD209)                               | 0.02   | 0.91 | 0.99 |
| Integrin beta-1 (ITGB1)                             | 0.01   | 0.92 | 0.99 |
| Hepatitis A virus cellular receptor 2 (HAVCR2)      | -0.02  | 0.92 | 0.99 |
| Cochlin (COCH)                                      | -0.01  | 0.97 | 0.99 |
| Kunitz-type protease inhibitor 2 (SPINT2)           | 0.01   | 0.97 | 0.99 |
| CD109 antigen (CD109)                               | -0.004 | 0.97 | 0.99 |
| Beta-1,4-glucuronyltransferase 1 (B4GAT1)           | 0.002  | 0.98 | 0.99 |
| Myocilin (MYOC)                                     | 0.003  | 0.99 | 0.99 |

The following 20 proteins were excluded from the analyses since more than 20% had missing values (values under the limit of detection): ADP-ribosyl cyclase/cyclic ADP-ribose hydrolase 2 (BST1), Beta-microseminoprotein (MSMB), C-C motif chemokine 21 (CCL21), Carbonic anhydrase 2 (CA2), Carbonic anhydrase 6 (CA6), CCN family member 5 (CCN5), CMRF35-like molecule 9 (CD300LG), Corticotropin-releasing factor-binding protein (CRHBP), Cytosolic phospholipase A2 (PLA2G4A), Fc receptor-like protein 5 (FCRL5), Flavin reductase NADPH (BLVRB), Galactoside 3(4)-L-fucosyltransferase, Alpha-(1,3)-fucosyltransferase 5 (FUT3/5), Inhibin beta C chain (INHBC), Integrin alpha-5 (ITGA5), Protein disulfide-isomerase (P4HB), Serine protease HTRA2, mitochondrial (HTRA2), Serine protease inhibitor Kazal-type 1 (SPINK1), Serine protease inhibitor Kazal-type 5 (SPINK5), Stress-induced-phosphoprotein 1 (STIP1), and Tyrosine-protein phosphatase non-receptor type 6 (PTPN6)
